# Supplementary material for: Seed Priming with MeJa Prevents Salt-Induced Growth Inhibition and Oxidative Damage in Sorghum bicolor by Inducing the Expression of Jasmonic Acid Biosynthesis Genes
Source: MDPI journal article supplement (doi:10.3390/ijms241210368), 2023-06-20
Supplement: s1 [file s1]

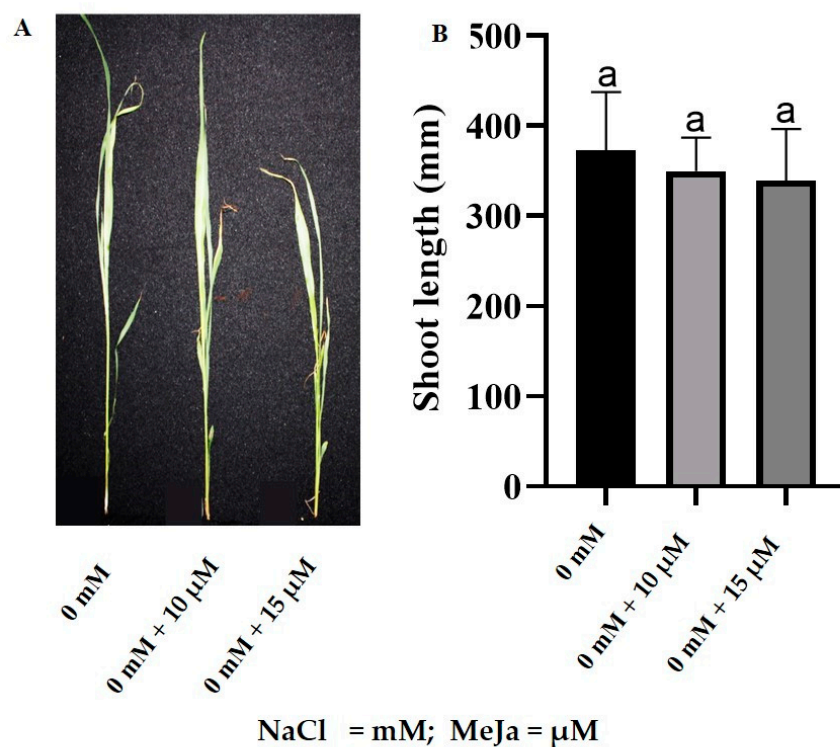

**Figure S1. Effect of Methyl Jasmonate (MeJa) on the growth of *S. bicolor* under normal condition.** Phenotype (A) and shoot length (B) of *S. bicolor* plants grown from seeds primed with 10 and 15  $\mu$ M MeJa in the absence of salt stress. Data in the figure represent the mean  $\pm$  standard deviation from three biological replicates. Different letters indicate significant differences ( $p < 0.05$ ) based on ANOVA one-way variance analysis following Tukey's comparison test.

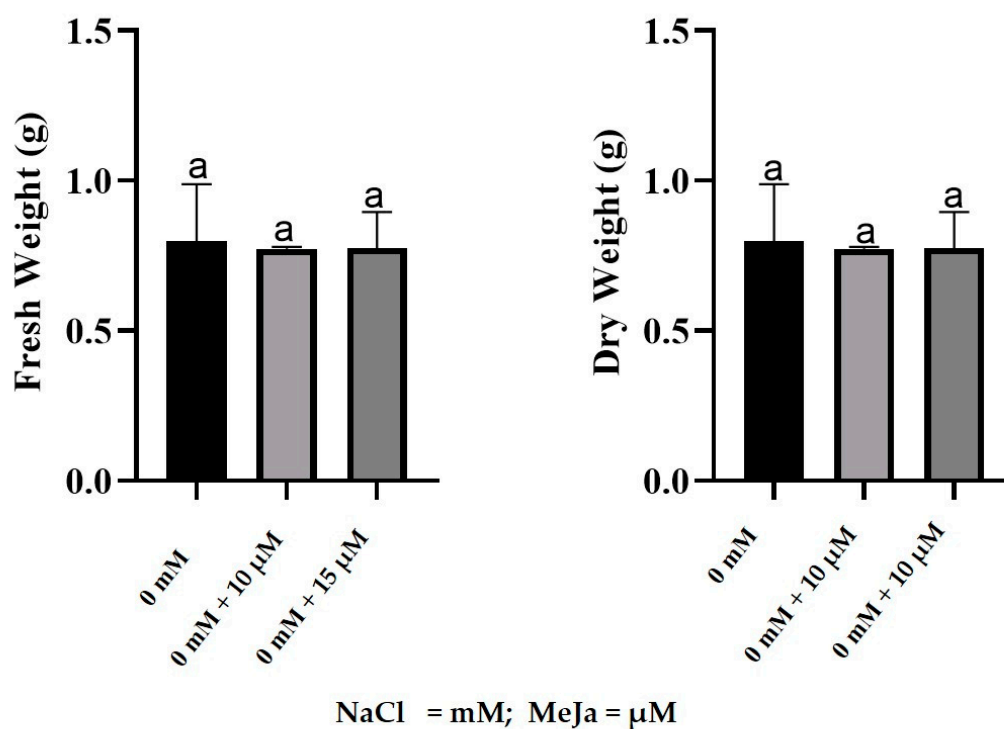

**Figure S2. Effect of Methyl Jasmonate (MeJa) on biomass of *S. bicolor* under normal conditions.** Fresh weight (A) and dry weight (B) of *S. bicolor* plants grown from seeds primed with 10 and 15 μM MeJa in the absence of salt stress. Data in the figure represent the mean  $\pm$  standard deviation from three biological replicates. Different letters indicate significant differences ( $p < 0.05$ ) based on ANOVA one-way variance analysis following Tukey's comparison test.

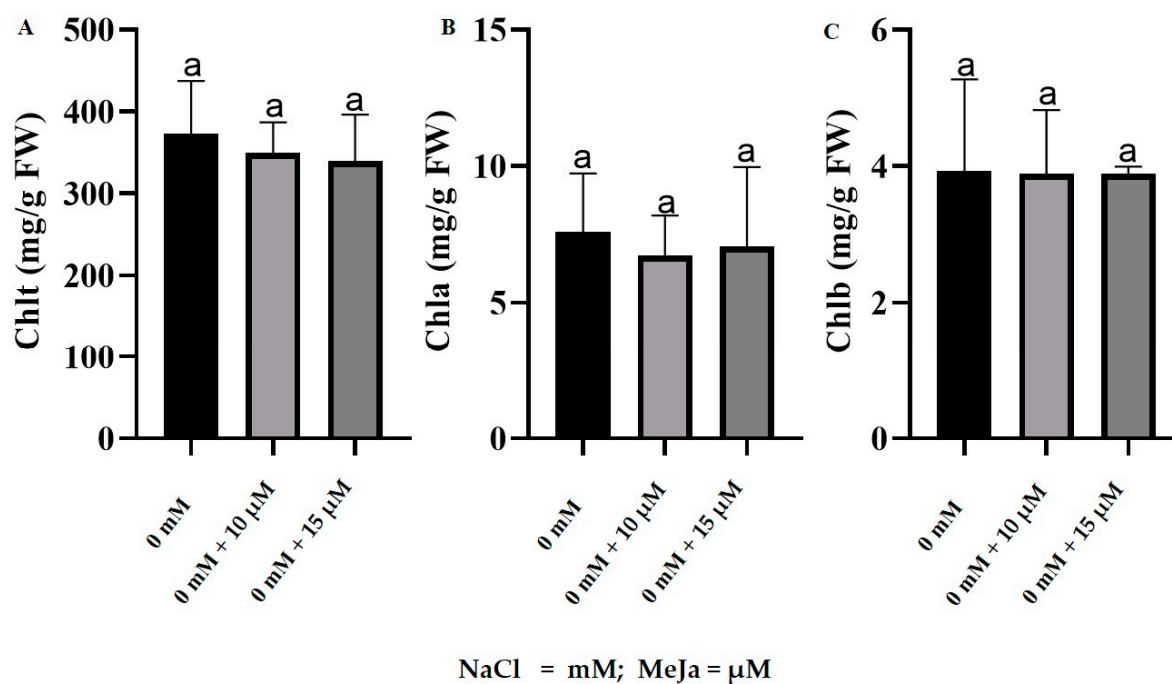

**Figure S3.** Effect of Methyl Jasmonate (MeJa) on the chlorophyll content in *S. bicolor* under normal (non-stressed) conditions. Photosynthetic pigments assayed include Chlorophyll *a* (A), Chlorophyll *b* (B) and total Chlorophyll (C) were determined from *S. bicolor* plants grown from seeds primed with 10 and 15 μM MeJa and stressed with 100 and 200 mM NaCl. Data in the table represent the mean ± standard deviation from three biological replicates ( $n = 3$ ). Different letters in the column indicate significant differences ( $p < 0.05$ ) based on ANOVA one-way variance analysis using Tukey's comparison test.

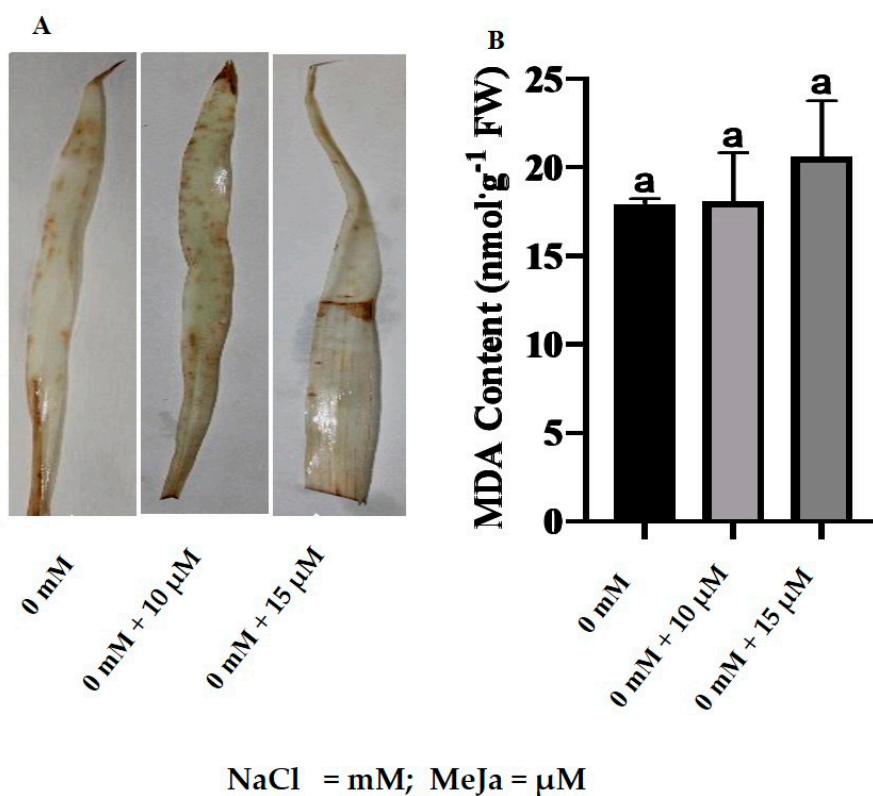

**Figure S4. Assessment of oxidative damage in *S. bicolor* in response to MeJa under normal (non-stressed) conditions.** Accumulation of  $\text{H}_2\text{O}_2$  on the leaves was determined by histochemical staining (A), and lipid peroxidation was determined by measuring MDA content (B) for *S. bicolor* plants grown from seeds primed with 10 and 15  $\mu$ M MeJa. Data in the figure represent the mean  $\pm$  standard deviation from three biological replicates. Different letters indicate significant differences ( $p < 0.05$ ) based on ANOVA one-way variance analysis using Tukey's comparison test.

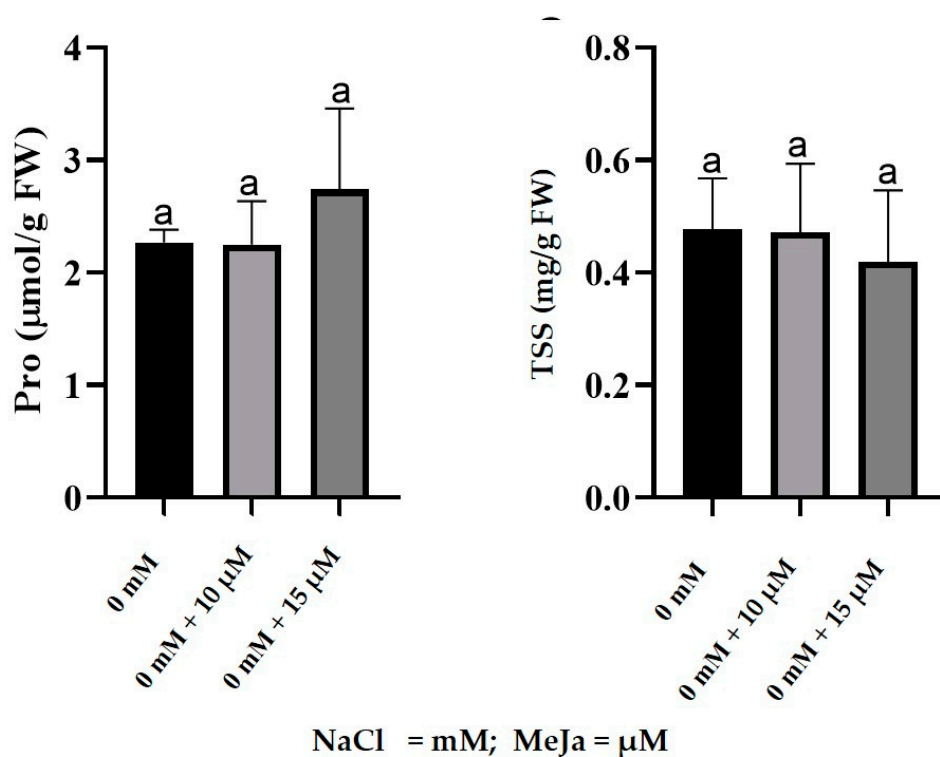

**Figure S5. Proline (Pro) and total soluble sugar (TSS) content in response to MeJa pre-treatment in *S. bicolor* under normal (non-stressed) conditions.** Proline content in *S. bicolor* plants grown from seeds primed with 10 and 15  $\mu\text{M}$  MeJa under 100 mM NaCl (A) or 200 mM NaCl (B). Total soluble sugars content in *S. bicolor* plants pre-treated with 10  $\mu\text{M}$  or 15  $\mu\text{M}$  MeJa under 100 mM NaCl (C) or 200 mM NaCl (D). Data in the figure represent the mean  $\pm$  standard deviation from three biological replicates. Different letters indicate significant differences ( $p < 0.05$ ) based on ANOVA one-way variance analysis using Tukey's comparison test
